# Supplementary material for: The SR Splicing Factors: Providing Perspectives on Their Evolution, Expression, Alternative Splicing, and Function in Populus trichocarpa
Source: MDPI journal article supplement (doi:10.3390/ijms222111369), 2021-10-21
Supplement: s1 [file s1]

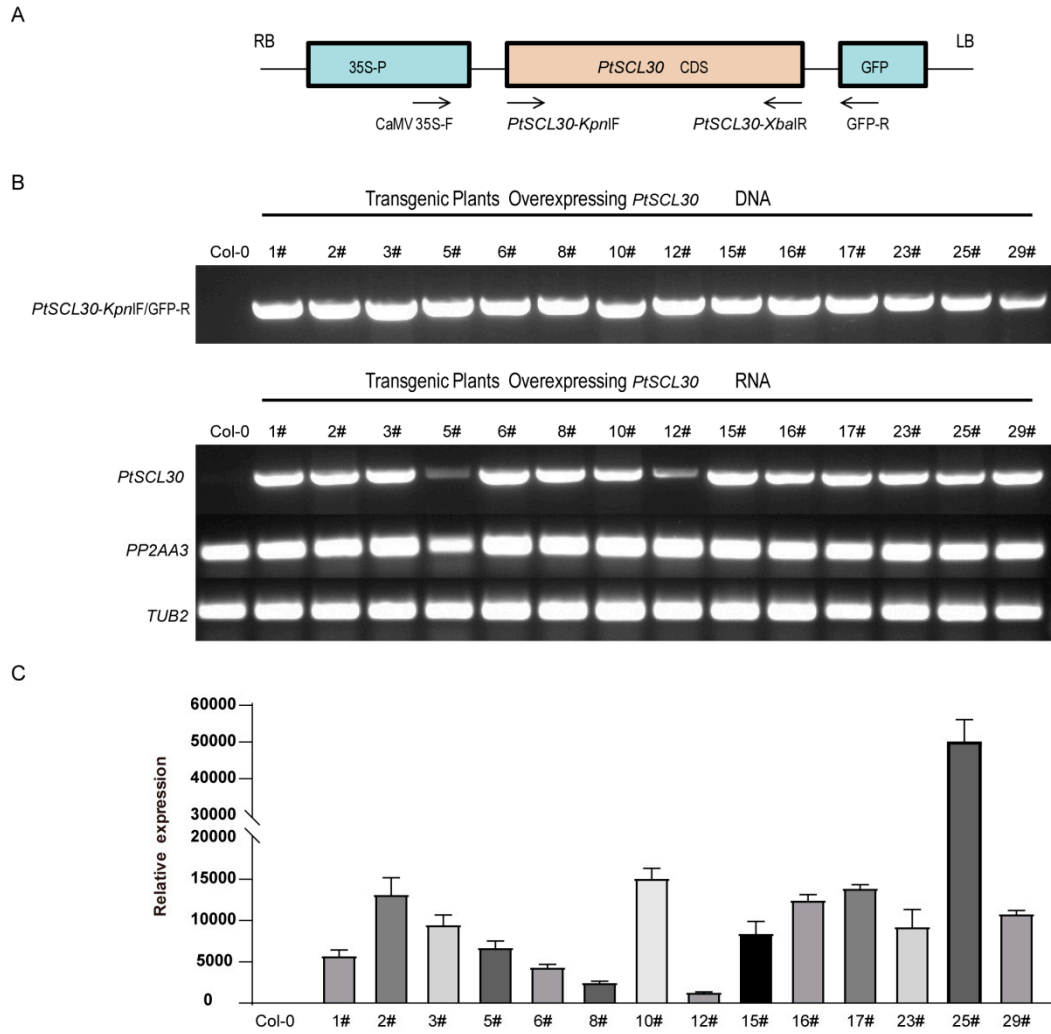

**Figure S1.** Construction of *PtSCL30* overexpression vector and identification of transgenic plants in *Arabidopsis*. **(A)** Schematic diagram of *PtSCL30* overexpression vector. The *PtSCL30* CDS was amplified by PCR with the following primers: *PtSCL30-KpnIF* and *PtSCL30-XbaIR*. The *PtSCL30* CDS region was cloned in the *KpnI* and *XbaI* sites of the pCAMBIA1300-sGFP vector. The arrows indicate forward and reverse primers (CaMV35S-F, *PtSCL30-KpnIF*, *PtSCL30-XbaIR* and GFP-R) which were used in PCR analysis. 35S-P: the 35S cauliflower mosaic virus promoter; RB: right border; LB: left border; GFP: green fluorescent protein. **(B)** Genomic DNA and RNA PCR analysis of Col-0 and 35S::*PtSCL30* OE lines. The genomic DNA and total RNA were isolated from rosette leaves and used in PCR analysis with the primer pairs: *PtSCL30-KpnIF* with GFP-R and *PtSCL30-KpnIF* with *PtSCL30-XbaIR*, respectively. **(C)** Relative expression levels of the *PtSCL30* gene in transgenic *Arabidopsis*. Error bars represent the standard deviations of three biological replicates. The genes *PP2AA3* (AT1G13320) and *TUB2* (AT5G62690) were used to measure the quality and quantity of cDNA and served as reference genes for normalization of the expression. The numbers represented the different lines of transgenic *Arabidopsis*.
