# Supplementary material for: The SR Splicing Factors: Providing Perspectives on Their Evolution, Expression, Alternative Splicing, and Function in Populus trichocarpa
Source: Int J Mol Sci. 2021 Oct 21;22(21):11369. doi: 10.3390/ijms222111369 (PMC8583155; doi:10.3390/ijms222111369)
Supplement: Supplementary file 1 [file ijms-22-11369-s001.zip]

Archive with 7 entries (7 files):
- Supplemental Figure S1 .pdf
- Supplementary Table S1.xlsx
- Supplementary Table S2.xlsx
- Supplementary Table S3.xlsx
- Supplementary Table S4.xlsx
- Supplementary Table S5.xlsx
- Supplementary Table S6.xlsx
