# Supplementary material for: The SR Splicing Factors: Providing Perspectives on Their Evolution, Expression, Alternative Splicing, and Function in Populus trichocarpa
Source: Int J Mol Sci. 2021 Oct 21;22(21):11369. doi: 10.3390/ijms222111369 (PMC8583155; doi:10.3390/ijms222111369)
Supplement: Supplementary file 1 [file ijms-22-11369-s001.zip › Supplementary Table S1.xlsx]

## Sheet: Table S1
Supplementary Table S1 Basic characteristics of PtSR genes in P. trichocarpa
Phytozome accession number	1Previous Nomenclature	Revised Nomenclature	Family	Gene Locus	2primary（CDS/bp）	Length of protein(aa)	Molecular weight（Da）	Introns	RRM	RRM location	RS	RS location	Zf-CCHC	Zf-CCHC location	pI	GARVY
Potri.005G024600	PtSR32	PtSR30	SR	Chr05:1826274-1832377	912	303	34555.3	13	2	8-74 112-174	1	170-303			10.66	-1.072
Potri.013G015500	PtSR34a	PtSR30a	SR	Chr13:979186-984891	897	298	33730.3	13	2	8-75 112-174	1	170-298			10.63	-0.984
Potri.012G021800	PtSR31	PtSR34	SR	Chr12:1925188-1929976	921	306	34057.1	12	2	9-76 126-188	1	179-229			10.04	-0.881
Potri.015G004600	PtSR29	PtSR34a	SR	Chr15:302664-306687	783	260	29312.5	13	2	9-76 115-177	1	168-260			10.55	-1.051
Potri.014G129900	PtSR33	PtSR35	SR	Chr14:9917077-9921853	897	298	33632.1	13	2	9-76 114-176	1	172-298			11.27	-1.233
Potri.T134200	PtSR34	PtSR35a	SR	scaffold_273:10063-15165	897	298	33645.1	12	2	9-76 112-174	1	170-298			11.17	-1.269
Potri.002G095800	/	PtSC34	SC	Chr02:6888639-6890999	708	235	27480.3	6	1	18-87	1	100-207			10.51	-1.479
Potri.005G165400	/	PtSC34a	SC	Chr05:17199708-17203979	813	270	31141.2	9	1	18-87	1	100-150			10.65	-1.568
Potri.T125700	/	PtSC35	SC	scaffold_222:57228-59054	777	258	30059.2	8	1	18-88	1	85-212			11.32	-1.551
Potri.019G050600	/	PtRSZ21	RSZ	Chr19:7580057-7584956	543	180	20462.6	4	1	4-61	1	104-180	1	92-107	10.97	-1.279
Potri.006G272400	PtRSZ21	PtRSZ22	RSZ	Chr06:27350116-27351668	564	187	21035.2	5	1	4-61	1	108-187	1	96-111	11.3	-1.331
Potri.018G009100	PtRSZ22	PtRSZ22a	RSZ	Chr18:629703-633561	597	198	21757.8	5	1	4-61	1	111-198	1	99-114	11.36	-1.317
Potri.002G153600	PtRS31	PtRS40	RS	Chr02:11579941-11584384	747	248	29361.4	5	2	4-62 96-158	1	197-248			9.9	-1.404
Potri.014G076600	PtRS30	PtRS41	RS	Chr14:6194833-6198402	750	249	29747.8	4	2	4-62 97-159	1	199-249			10.05	-1.512
Potri.006G197000	/	PtSCL25	SCL	Chr06:21258904-21261374	639	212	24903.6	4	1	40-109	1	139-212			10.76	-1.365
Potri.016G062500	/	PtSCL26	SCL	Chr16:4391378-4394340	603	200	23467.2	5	1	40-109	1	118-200			11.02	-1.339
Potri.008G196700	/	PtSCL28	SCL	Chr08:13733409-13738635	741	246	28956.9	6	1	50-120	2	3-53 120-198			11.54	-1.772
Potri.010G026100	/	PtSCL28a	SCL	Chr10:3670282-3674640	759	252	29460.6	6	1	50-120	2	3-53 141-200			11.45	-1.71
Potri.008G056600	PtSCL31	PtSCL30	SCL	Chr08:3350767-3354987	825	274	31348.6	7	1	46-114	1	113-183			11.32	-1.384
Potri.010G203200	PtSCL31a	PtSCL30a	SCL	Chr10:19472397-19476713	822	273	30897	7	1	45-114	1	112-182			11.16	-1.355
Potri.001G006400	PtSCL32	PtSCL33	SCL	Chr01:435622-439912	735	244	28728.9	5	1	28-107	1	116-224			11.63	-1.695
Potri.003G218600	PtSCL29	PtSCL33a	SCL	Chr03:21452725-21457689	738	245	28584.8	5	1	28-107	1	116-227			11.47	-1.568
Potri.006G215200	PtRS2Z34	PtRS2Z32	RS2Z	Chr06:22873640-22877012	882	293	33777	6	1	13-74	1	125-273	2	100-115 121-138	10.18	-1.636
Potri.016G081700	PtRS2Z33	PtRS2Z33	RS2Z	Chr16:6333027-6337009	873	290	33419.6	6	1	13-74	2	125-197 208-270	2	100-115 121-138	10.13	-1.677
1 the name of SR gene in Populus with previously reported[1]
2 the information from Phytozome V12.1 (Populus trichocarpa v.3.1)
[1] D.N. Richardson, M.F. Rogers, A. Labadorf, A. Ben-Hur, H. Guo, A.H. Paterson, A.S. Reddy, Comparative analysis of serine/arginine-rich proteins across 27 eukaryotes: insights into sub-family classification and extent of alternative splicing, PLoS One, 6 (2011) e24542.

## Sheet: Sheet2
Table S1. Basic information of the SR genes in P. trichocarpa
Phytozome accession number	Previous Nomenclature	Revised Nomenclature	Family	Gene Locus	Length of protein(aa)	Molecular weight	Introns	RRM	RRM location	RS	RRM location	Zf-CCHC	Zf-CCHC location	PI	GARVY
Potri.005G024600	PtSR32	PtSR30	SR	Chr05:1826859-1832039	309	34555.3	13	2	8-74 112-174	1	170-303			10.66	-1.072
Potri.013G015500	PtSR34a	PtSR30a	SR	Chr13:979765-982215	296	33852	13	2	8-75 112-174	1	170-298			10.03	-0.685
Potri.012G021800	PtSR31	PtSR34	SR	Chr12:1925188-1929976	306	34057.1	12	2	9-76 126-188	1	179-229			10.04	-0.881
Potri.015G004600	PtSR29	PtSR34a	SR	Chr15:301982-306672	261	29424.7	13	2	9-76 115-177	1	168-260			10.39	-0.991
Potri.014G129900	PtSR33	PtSR35	SR	Chr14:9917332-9921498	307	34689.3	13	2	9-76 114-176	1	172-298			11.26	-1.194
Potri.T134200	PtSR34	PtSR35a	SR	scaffold_273:9757-15438	298	33645.1	12	2	9-76 112-174	1	170-298			11.17	-1.269
Potri.002G095800	/	PtSC34	SC	Chr02:6888639-6890999	235	27480.3	7	1	18-87	1	100-207			10.51	-1.479
Potri.005G165400	/	PtSC34a	SC	Chr05:17199748-17203400	270	31141.2	9	1	18-87	1	100-150			10.65	-1.568
Potri.T125700	/	PtSC35	SC	scaffold_222:56779-59054	267	30985.3	7	1	18-88	1	85-212			11.28	-1.472
Potri.019G050600	/	PtRSZ21	RSZ	Chr19:7579366-7585304	215	24330	4	1	4-61	1	104-180	1	92-107	10.53	-1.069
Potri.006G272400	PtRSZ21	PtRSZ22	RSZ	Chr06:27350116-27351668	187	21035.2	5	1	4-61	1	108-187	1	96-111	11.3	-1.331
Potri.018G009100	PtRSZ22	PtRSZ22a	RSZ	Chr18:629871-633564	198	21757.8	5	1	4-61	1	111-198	1	99-114	11.36	-1.317
Potri.002G153600	PtRS31	PtRS40	RS	Chr02:11579948-11583706	264	31215.8	5	2	4-62 96-158	1	197-248			9.55	-1.096
Potri.014G076600	PtRS30	PtRS41	RS	Chr14:6194860-6198316	249	29747.8	5	2	4-62 97-159	1	199-249			10.05	-1.512
Potri.006G197000	/	PtSCL25	SCL	Chr06:21258030-21261408	212	24903.6	4	1	40-109	1	139-212			10.76	-1.365
Potri.016G062500	/	PtSCL26	SCL	Chr16:4391489-4394170	200	23467.2	5	1	40-109	1	118-200			11.02	-1.339
Potri.008G196700	/	PtSCL28	SCL	Chr08:13733398-13738655	246	28956.9	6	1	50-120	2	3-53 120-198			11.54	-1.772
Potri.010G026100	/	PtSCL28a	SCL	Chr10:3670218-3674644	252	29460.6	6	1	50-120	2	3-53 141-200			11.45	-1.71
Potri.008G056600	PtSCL31	PtSCL30	SCL	Chr08:3350935-3355015	274	31348.6	7	1	46-114	1	113-183			11.32	-1.384
Potri.010G203200	PtSCL31a	PtSCL30a	SCL	Chr10:19472403-19476730	273	30897	7	1	45-114	1	112-182			11.16	-1.355
Potri.001G006400	PtSCL32	PtSCL33	SCL	Chr01:435610-440066	278	32047.9	5	1	28-107	1	116-224			9.77	-0.967
Potri.003G218600	PtSCL29	PtSCL33a	SCL	Chr03:21453352-21457614	245	28584.8	5	1	28-107	1	116-227			11.47	-1.568
Potri.006G215200	PtRS2Z34	PtRS2Z32	RS2Z	Chr06:22874055-22877077	313	36036	6	1	13-74	1	125-273	2	100-115 121-138	10.13	-1.408
Potri.016G081700	PtRS2Z33	PtRS2Z33	RS2Z	Chr16:6333027-6336498	290	33419.6	6	1	13-74	2	125-197 208-270	2	100-115 121-138	10.13	-1.677
