# Supplementary material for: The SR Splicing Factors: Providing Perspectives on Their Evolution, Expression, Alternative Splicing, and Function in Populus trichocarpa
Source: Int J Mol Sci. 2021 Oct 21;22(21):11369. doi: 10.3390/ijms222111369 (PMC8583155; doi:10.3390/ijms222111369)
Supplement: Supplementary file 1 [file ijms-22-11369-s001.zip › Supplementary Table S2.xlsx]

## Sheet: Table S2
Supplementary Table S2 The duplicated gene pairs of PtSR genes in P. trichocarpa
gene pairs	gene names	ks
Potri.008G056600-Potri.010G203200	PtSCL30-PtSCL30a	0.21637
Potri.001G006400-Potri.003G218600	PtSCL33-PtSCL33a	0.21725
Potri.016G081700-Potri.006G215200	PtRS2Z33-PtRS2Z32	0.23626
Potri.006G272400-Potri.018G009100	PtRSZ22-PtRSZ22a	0.27003
Potri.008G196700-Potri.010G026100	PtSCL28-PtSCL28a	0.27179
Potri.005G024600-Potri.013G015500	PtSR30-PtSR30a	0.27895
Potri.002G153600-Potri.014G076600	PtRS40-PtRS41	0.28911
Potri.002G095800-Potri.005G165400	PtSC34-PtSC34a	0.28993
Potri.006G197000-Potri.016G062500	PtSCL25-PtSCL26	0.31823
Potri.012G021800-Potri.015G004600	PtSR34-PtSR34a	0.63386
Potri.014G129900-Potri.005G024600	PtSR35-PtSR30	1.56486
Potri.001G006400-Potri.016G062500	PtSCL33-PtSCL26	1.78104
Potri.014G129900-Potri.013G015500	PtSR35-PtSR30a	1.85485
Potri.003G218600-Potri.016G062500	PtSCL33a-PtSCL26	1.87695
Potri.003G218600-Potri.006G197000	PtSCL33a-PtSCL25	1.95952
Potri.001G006400-Potri.006G197000	PtSCL33-PtSCL25	2.17016
