# Supplementary material for: The SR Splicing Factors: Providing Perspectives on Their Evolution, Expression, Alternative Splicing, and Function in Populus trichocarpa
Source: Int J Mol Sci. 2021 Oct 21;22(21):11369. doi: 10.3390/ijms222111369 (PMC8583155; doi:10.3390/ijms222111369)
Supplement: Supplementary file 1 [file ijms-22-11369-s001.zip › Supplementary Table S3.xlsx]

## Sheet: Table S3
Supplementary Table S3 Cis-acting elements in the promoter region of PtSR genes in P. trichocarpa
Gene ID	cis-elements	Circadian	CAT-box	TC-rich	MBS	LTR	ARE	ABRE	CGTCA-motif	TGACG-motif	TCA-element	AuxRR-core	TGA-element	TATC-box	P-box	GARE-motif	AT-rich	TATA-box	CAAT-box
	Function	cis-acting regulatory element involved in circadian control	cis-acting regulatory element related to meristem expression	cis-acting element involved in defense and stress responsiveness	MYB binding site involved in drought-inducibility	Response to low-temperature responsiveness	cis-acting regulatory element essential for the anaerobic induction	Response to abscisic acid	Response to MeJA	Response to MeJA	Response to salicylic acid	Response to auxin	Response to auxin	Response to gibberellin	Response to gibberellin	Response to gibberellin	binding site of AT-rich DNA binding protein (ATBP-1)	core promoter element around -30 of transcription start	common cis-acting element in promoter and enhancer regions
Potri.005G024600	PtSR30						√(2)	√(7)	√(1)	√(1)								√(75)	√(11)
Potri.013G015500	PtSR30a			√(1)			√(3)	√(7)	√(3)	√(3)	√(1)	√(1)					√(1)	√(71)	√(19)
Potri.012G021800	PtSR34				√(1)		√(3)				√(1)		√(1)					√(51)	√(20)
Potri.015G004600	PtSR34a		√(1)		√(1)	√(1)	√(3)	√(1)	√(2)	√(2)					√(1)		√(1)	√(70)	√(14)
Potri.014G129900	PtSR35			√(1)	√(1)	√(2)	√(9)	√(1)	√(1)	√(1)							√(1)	√(40)	√(15)
Potri.T134200	PtSR35a						√(4)	√(7)	√(2)	√(2)	√(1)		√(1)		√(1)		√(2)	√(113)	√(13)
Potri.002G095800	PtSC34						√(3)	√(4)	√(2)	√(2)								√(37)	√(12)
Potri.005G165400	PtSC34a					√(1)	√(8)	√(2)	√(3)	√(3)	√(1)		√(1)	√(1)				√(40)	√(23)
Potri.T125700	PtSC35				√(2)	√(1)	√(7)	√(3)	√(1)	√(1)		√(1)					√(1)	√(68)	√(12)
Potri.019G050600	PtRSZ21				√(2)	√(1)	√(3)	√(5)	√(2)	√(2)				√(1)				√(45)	√(22)
Potri.006G272400	PtRSZ22		√(1)	√(1)	√(1)	√(2)	√(2)	√(1)	√(2)	√(2)	√(2)				√(1)			√(27)	√(14)
Potri.018G009100	PtRSZ22a		√(2)	√(1)		√(1)	√(3)	√(1)	√(1)	√(1)				√(1)				√(52)	√(11)
Potri.002G153600	PtRS40	√(2)			√(2)	√(1)	√(2)	√(2)	√(2)	√(2)					√(1)			√(22)	√(14)
Potri.014G076600	PtRS41		√(2)	√(1)	√(3)	√(2)	√(3)	√(1)	√(6)	√(6)					√(1)	√(3)	√(1)	√(15)	√(12)
Potri.006G197000	PtSCL25	√(1)		√(1)		√(1)		√(2)			√(1)						√(1)	√(57)	√(17)
Potri.016G062500	PtSCL26	√(1)					√(3)	√(3)	√(1)	√(1)		√(1)				√(1)	√(1)	√(52)	√(10)
Potri.008G196700	PtSCL28		√(1)			√(1)	√(5)	√(5)	√(2)	√(2)					√(1)			√(42)	√(13)
Potri.010G026100	PtSCL28a			√(2)		√(2)	√(3)						√(1)					√(108)	√(18)
Potri.008G056600	PtSCL30				√(1)	√(1)	√(2)	√(1)	√(1)	√(1)							√(1)	√(70)	√(13)
Potri.010G203200	PtSCL30a		√(2)		√(1)	√(1)	√(1)	√(2)	√(1)	√(1)	√(1)	√(2)					√(1)	√(33)	√(18)
Potri.001G006400	PtSCL33				√(1)	√(1)		√(3)	√(2)	√(2)			√(2)					√(31)	√(8)
Potri.003G218600	PtSCL33a					√(1)		√(1)			√(1)		√(1)		√(1)			√(38)	√(10)
Potri.006G215200	PtRS2Z32						√(1)	√(1)										√(72)	√(13)
Potri.016G081700	PtRS2Z33				√(1)	√(7)	√(5)						√(1)				√(2)	√(39)	√(17)
The check marks represent the presence of elements and the numbers in parentheses represent the number of elements
