# Supplementary material for: The SR Splicing Factors: Providing Perspectives on Their Evolution, Expression, Alternative Splicing, and Function in Populus trichocarpa
Source: Int J Mol Sci. 2021 Oct 21;22(21):11369. doi: 10.3390/ijms222111369 (PMC8583155; doi:10.3390/ijms222111369)
Supplement: Supplementary file 1 [file ijms-22-11369-s001.zip › Supplementary Table S4.xlsx]

## Sheet: Table S4
Supplementary Table S4 RT-PCR and qRT-PCR primers of PtSR genes
Gene ID	Gene name	Primer (5'-3')
Potri.005G024600	PtSR30	F: GCAGTCACGGTCGAAGCTAT
		R: GCACGAGAACGAGAGGAAAC
Potri.013G015500	PtSR30a	F: GTGGCATGACAGGAATTGTG
		R: ACTCCGGCTTCTTGACACAT
Potri.012G021800	PtSR34	F: GTCGGAGCAGAAGCAGGA
		R: GACCTCGACCTTGACCTTGA
Potri.015G004600	PtSR34a	F: GAGCTCTCCATCAAGGAGCA
		R: GGACCTTGATCTTGGTCTGG
Potri.014G129900	PtSR35	F: TGATTCCAAACGGGACTCAT
		R: CTTGACCCAGAGCGAGAAAC
Potri.T134200	PtSR35a	F: GCCGTGATCGATCTCATTCT
		R: GACCGACGTGAGGATTTGTT
Potri.002G095800	PtSC34	F: CCAAAGTATCGGGATGGCTA
		R: TCACACTTCGGCGATGATAA
Potri.005G165400	PtSC34a	F: CGTCCAAGGTATCGAGATGG
		R: ACCCATCACGGTCATAACGA
Potri.T125700	PtSC35	F: GGACGTGGTAGAAGCCGTTA
		R: TCAGGGCTTTCACCTTTCAC
Potri.019G050600	PtRSZ21	F: TCACGAGGCTTGGGAAGTAG
		R: CCTGCTATAGCTGCGACCTC
Potri.006G272400	PtRSZ22	F: GTGTTGGTTCAGGAGGAGGA
		R: GCTCTTCACGTCCACGGTAT
Potri.018G009100	PtRSZ22a	F: GTGGTCGTTCTGGTGGTTCT
		R: TGCTCCTTCGACCATAGCTT
Potri.002G153600	PtRS40	F: AGGAACGGGTACAGTCCTGA
		R: TCTGTCCATGGCCGTAGTCT
Potri.014G076600	PtRS41	F: CCACGGAGATCAAGATCCAT
		R: GTTCCTTTCCTTCGGGTTTC
Potri.006G197000	PtSCL25	F: GGGGTTATGGGAGGAGACAT
		R: TGTCCTTTAGCGGACCAAAC
Potri.016G062500	PtSCL26	F: GCTCTCCATCACCACGCTAT
		R: GGGCTCCTGCTATAGCTCCT
Potri.008G196700	PtSCL28	F: AAACTATTGGTGGGCGTGAG
		R: TTGGGGACCTTGATGATGTT
Potri.010G026100	PtSCL28a	F: CCACGGAGATCAAGATCCAT
		R: GTTCCTTTCCTTCGGGTTTC
Potri.008G056600	PtSCL30	F: ACGGTCCCCTCGCCATTATC
		R: GTCCGCGTACCTTCTCTCTG
Potri.010G203200	PtSCL30a	F: GGACGTTCTCGTTCTCGTTC
		R: TATCAGGGGAAGCGGAGTAG
Potri.001G006400	PtSCL33	F: TCCAAGGGGCTATGGTAGAA
		R: ACGAAGGTTGCGAACTAGGA
Potri.003G218600	PtSCL33a	F: GGGGTCGAGTTGGTGATAGA
		R: GACTGTGAGACCGGGATGTT
Potri.006G215200	PtRS2Z32	F: CCGAAGAGAGAGCGAAGTGT
		R: TGCTCATCATCCAGTTTTCG
Potri.016G081700	PtRS2Z33	F: CGAGCCAAAGAATACCAAGG
		R: GGCCATTAGTCTGAGGAGGA
Potri.014G094900	TUBG1	F: CAGGGAAAGGGTGTTGAAGA
		R:TCCAGCAATTGAATGGCATA
Potri.002G026800	Histone3 (HIS-1)	F: GGTGGAGTCAAGAAGCCTCA
		R: TGAGCGATTTCACGAACAAG
Potri.005G072300	Histone3 (HIS-2)	F: TGAGCTCCTGATTAGGAAACTCCCT
		R: GTTGGTGTCTTCGAACAGCCCAAC
