# Supplementary material for: The SR Splicing Factors: Providing Perspectives on Their Evolution, Expression, Alternative Splicing, and Function in Populus trichocarpa
Source: Int J Mol Sci. 2021 Oct 21;22(21):11369. doi: 10.3390/ijms222111369 (PMC8583155; doi:10.3390/ijms222111369)
Supplement: Supplementary file 1 [file ijms-22-11369-s001.zip › Supplementary Table S5.xlsx]

## Sheet: Table S5
Supplementary Table S5 Primers used for alternative splicing of PtSR genes
Gene ID	Gene name	primer (5'-3')
Potri.005G024600	PtSR30	F: ATGAGCCGAGCAAGTCGAACAC
		R: TCAACGATCCATGGAGTCTACTGAA
Potri.013G015500	PtSR30a	F: ATGAGCCGAGCAAGTCGAACA
		R: TCAACGATCTGAGTCCACCGA
Potri.012G021800	PtSR34	F: ATGAGTGGTCGTTTTTCTCGTA
		R: TCAGAGTTTTCTACATCGAAG
Potri.015G004600	PtSR34a	F: ATGAGTGGTCGCTTTTCTCGTAC
		R: TTCCAGACCGTGCCTTGTTG
Potri.014G129900	PtSR35	F: ATGAGTAGCCGAGCGAGCAG
		R: GCTTCTGCTTCTGCTATCCCTGG
Potri.T134200	PtSR35a	F: ATGAGCAGCCGAGCGAGCAGGA
		R: TCACCGTGATAAACTCTTGCTT
Potri.002G095800	PtSC34	F: ATGTCGCACTTCGGCCGATCTG
		R: TCAAGAATCCACCGGTTCATCA
Potri.005G165400	PtSC34a	F: ATGTCGCATTTCGGCCGATCTG
		R: TCAAGAATCAACTGGTTCATTG
Potri.T125700	PtSC35	F: ATGTCTCACTTCGGCAGGTCTG
		R: TCTGAATTTCGCGGGGATGG
Potri.019G050600	PtRSZ21	F: ATGTCTCGCGTTTATGTTGGGAATT
		R: TCAGTCGCCAATAGCATAAGGTGAA
Potri.006G272400	PtRSZ22	F: ATGTCTCGTGTATATGTCGGTAAC
		R: TTAACTCCTGCTTCGGCGCCGAT
Potri.018G009100	PtRSZ22a	F: ATGTCTCGGGTTTATGTCGGTAAC
		R: TTAACTCCTGCTTCGGCGAC
Potri.002G153600	PtRS40	F: ATGAAGGCTATATTTTGCGGCAATC
		R: GGTCTGGCATTTGTATTCTGTCCAT
Potri.014G076600	PtRS41	F: ATGAAGGCTATATTTTGCGGGAATC
		R: TCAAGAACGAGACCTTTCTCGAGAT
Potri.006G197000	PtSCL25	F: ATGAGGGGAAGAAGCTACGATTACA
		R: TCACCTGGAGTCCTCTAGGCT
Potri.016G062500	PtSCL26	F: ATGAGGGGAAGAAGCTACAG
		R: TCACCTAGAGTACTCCAGGC
Potri.008G196700	PtSCL28	F: ATGCCAAGGAACAGAAGCCG
		R: TCACGAACGAGACCTCAATGGA
Potri.010G026100	PtSCL28a	F: ATGCCAAGGCACAGAAGCC
		R: TTAGCGAGAACCATAGGATTGTGAA
Potri.008G056600	PtSCL30	F: ATGAGGAGATATAGTCCACCAC
		R: CTATCTAGCATGCCTTGGTGAC
Potri.010G203200	PtSCL30a	F: ATGAGGAGATATAGTCCACCATACT
		R: TTATCTAGTATGCCTTGGTGACAAG
Potri.001G006400	PtSCL33	F: ATGAGGGGAAGGAGTTATAGTC
		R: TTAAGGACTAGGAGATCTTTCT
Potri.003G218600	PtSCL33a	F: ATGAGAGGAAGGAGTTATAGTC
		R: TTATGGACTAGGAGACTTGTCT
Potri.006G215200	PtRS2Z32	F: ATGCCGCGATATGATGATCGATATG
		R: TCAACGTGACACGTCACTATCT
Potri.016G081700	PtRS2Z33	F: ATGCCACGTTATGATGACCGAT
		R: TCAACGTGACACATCACTATC
Potri.002G026800	Histone3 (HIS-1)	F: GGTGGAGTCAAGAAGCCTCA
		R: TGAGCGATTTCACGAACAAG
Potri.005G072300	Histone3 (HIS-2)	F: TGAGCTCCTGATTAGGAAACTCCCT
		R: GTTGGTGTCTTCGAACAGCCCAAC
