# Supplementary material for: The SR Splicing Factors: Providing Perspectives on Their Evolution, Expression, Alternative Splicing, and Function in Populus trichocarpa
Source: Int J Mol Sci. 2021 Oct 21;22(21):11369. doi: 10.3390/ijms222111369 (PMC8583155; doi:10.3390/ijms222111369)
Supplement: Supplementary file 1 [file ijms-22-11369-s001.zip › Supplementary Table S6.xlsx]

## Sheet: Table S6
Supplementary Table S6 A summary of the sequenced AS variants of PtSR genes
Gene	Products	1Size of the sequenced (bp)	Size of the primer products (bp)	2Primary (CDS/bp)	1Sequenced of amino acid length (aa)	2Peptide sequence (aa)
PtSR30	3	1) 3083 2) 1618 3) 912	912	912	1) 283 2) 264 3) 303	303
PtSR30a	2	1) 1193 2) 897	897	897	1) 260 2) 298	298
PtSR34	2	1) 904 2) 898	921	921	1) 279 2) 277	306
PtSR34a	2	1) 1050 2) 775	775	783	1) 66 2) 258	260
PtSR35	2	1) 879 2) 867	873	897	1) 293 2) 289	298
PtSR35a	1	891	897	897	296	298
PtSC34	2	1) 904 2) 708	708	708	1) 125 2) 235	235
PtSC34a	2	1) 910 2) 876	813	813	1) 278 2) 291	270
PtSC35	2	1) 1255 2) 764	764	777	1) 135 2) 254	258
PtRSZ21	1	543	543	543	180	180
PtRSZ22	1	564	564	564	187	187
PtRSZ22a	1	597	597	597	197	197
PtRS40	1	650	650	747	216	248
PtRS41	3	1) 1017 2) 807 3) 750	750	750	1) 89 2) 36 3) 249	249
PtSCL25	5	1) 1100 2) 1038 3) 891 4) 663 5） 639	639	639	1) 76 2) 91 3) 91 4) 220 5) 212	212
PtSCL26	3	1) 1057 2) 851 3) 603	603	603	1) 76 2) 91 3) 200	200
PtSCL28	1	741	741	741	246	246
PtSCL28a	1	759	759	759	252	252
PtSCL30	2	1) 1179 2) 825	825	825	1) 235 2) 274	274
PtSCL30a	2	1) 822 2) 804	822	822	1) 273 2) 267	273
PtSCL33	2	1) 965 2) 735	735	735	1) 82 2) 244	244
PtSCL33a	1	738	738	738	245	245
PtRS2Z32	2	1) 942 2) 882	882	882	1) 313 2) 293	293
PtRS2Z33	1	873	873	873	290	290
1 the Sequencing results of different transcripts and corresponding amino acid length
2 the primary CDS size and peptide sequence of PtSR genes from Phytozome
